# Supplementary material
Source: PubMed Central journal article supplement (PMC8820447)
Supplement: NIHMS1752936-supplement-Supplemental_Digital_Content_2.pdf [file NIHMS1752936-supplement-Supplemental_Digital_Content_2.pdf]

**Appendix 1. Flow diagram of study sample with inclusion and exclusion criteria. Our study sample was linked using an integrated SAS application system, LINKPRO 3.01, for probabilistic and deterministic record linkage. The system records where no unique identifiers exist. It calculates and applies probabilistic weights in order to estimate the likelihood that a pair of records from separate files corresponds to the same individual. Since the linkage launched in 1998, more than 99% of birth and fetal death certificates have been linked to their delivery hospital discharge records.**

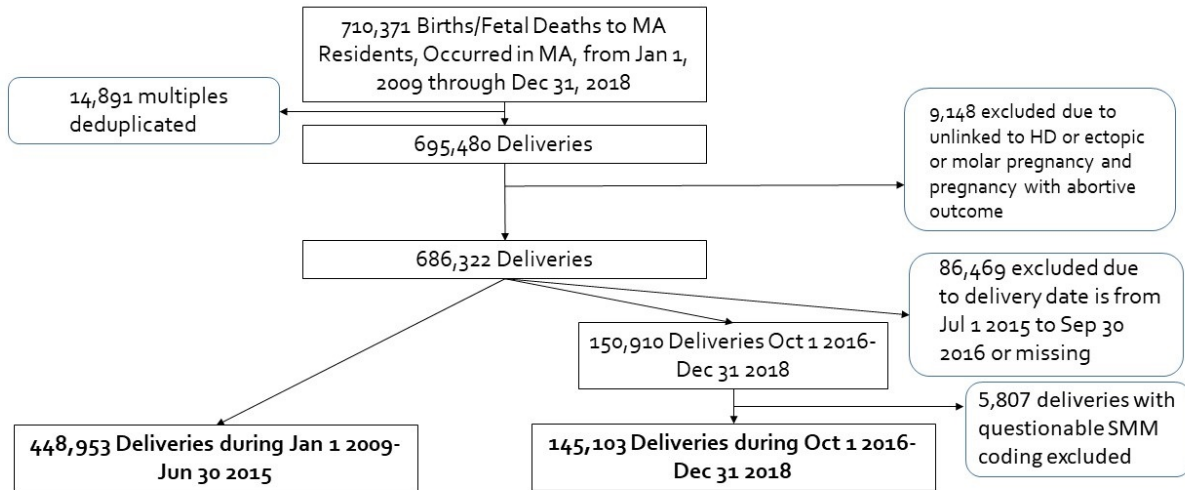

Declercq E, Cabral H, Cui X, Liu C, Amutah-Onukagha N, Larson e, et al. Using longitudinally linked data to measure severe maternal morbidity. *Obstet Gynecol* 2022;139.

The authors provided this information as a supplement to their article.

©2022 American College of Obstetricians and Gynecologists.

**Appendix 2. International Classification of Diseases (ICD)-9 and ICD-10 Codes Used for Severe Maternal Morbidity Identification**

| ICD-9         | ICD-10                    | ICD-10 Description                                                                                          |
|---------------|---------------------------|-------------------------------------------------------------------------------------------------------------|
| 410.xx        | I21.xx                    | Acute myocardial infarction                                                                                 |
|               | I22.x                     | Subsequent ST elevation (STEMI) and non-ST elevation (NSTEMI) myocardial infarction                         |
| 441.xx        | I71.xx                    | Aortic aneurysm and dissection                                                                              |
|               | I79.0                     | Aneurysm of aorta in diseases classified elsewhere                                                          |
| 584.5 - 584.9 | N17.x                     | Acute kidney failure                                                                                        |
| 669.3x        | O90.4                     | Postpartum acute kidney failure                                                                             |
| 518.5x        | J80                       | Acute respiratory distress syndrome                                                                         |
| 518.81        | J95.1                     | Acute pulmonary insufficiency following thoracic surgery                                                    |
| 518.82        | J95.2                     | Acute pulmonary insufficiency following nonthoracic surgery                                                 |
| 518.84        | J95.3                     | Chronic pulmonary insufficiency following surgery                                                           |
| 799.1         | J95.82x                   | Postprocedural respiratory failure                                                                          |
|               | J96.0x                    | Acute respiratory failure                                                                                   |
|               | J96.2x                    | Acute and chronic respiratory failure                                                                       |
|               | J96.9x                    | Respiratory failure, unspecified                                                                            |
|               | R06.03                    | Acute respiratory distress syndrome                                                                         |
|               | R09.2                     | Respiratory arrest                                                                                          |
|               | 673.1x                    | O88.112                                                                                                     |
| O88.113       |                           | Amniotic fluid embolism in pregnancy, third trimester                                                       |
| O88.119       |                           | Amniotic fluid embolism in pregnancy, unspecified trimester                                                 |
| O88.12        |                           | Amniotic fluid embolism in childbirth                                                                       |
| O88.13        |                           | Amniotic fluid embolism in the puerperium                                                                   |
| 427.41        | I46.x                     | Cardiac arrest                                                                                              |
| 427.42        | I49.0x                    | Ventricular fibrillation and flutter                                                                        |
| 427.5         |                           |                                                                                                             |
| 99.6x         | 5A2204Z                   | Restoration of cardiac rhythm, single                                                                       |
|               | 5A12012                   | Performance of cardiac output, single, manual                                                               |
| 286.6         | D65                       | Disseminated intravascular coagulation [defibrination syndrome]                                             |
| 286.9         | D68.8                     | Other specified coagulation effects                                                                         |
| 641.3x        | D68.9                     | Coagulation defect, unspecified                                                                             |
| 666.3X        | O45.002, O45.003, O45.009 | Premature separation of placenta with coagulation defect, unspecified; second, third, unspecified trimester |
|               | O45.012, O45.013, O45.019 | Premature separation of placenta with afibrinogenemi; second, third, unspecified trimester                  |

Declercq E, Cabral H, Cui X, Liu C, Amutah-Onukagha N, Larson e, et al. Using longitudinally linked data to measure severe maternal morbidity. *Obstet Gynecol* 2022;139.

The authors provided this information as a supplement to their article.

©2022 American College of Obstetricians and Gynecologists.

|        |                              |                                                                                                                    |
|--------|------------------------------|--------------------------------------------------------------------------------------------------------------------|
|        | O45.022, O45.023,<br>O45.029 | Premature separation of placenta with disseminated intravascular coagulation; second, third, unspecified trimester |
|        | O45.092, O45.093,<br>O45.099 | Premature separation of placenta with other coagulation defect; second, third, unspecified trimester               |
|        | O46.002, O46.003,<br>O46.009 | Antepartum hemorrhage with coagulation defect, unspecified; second, third, unspecified trimester                   |
|        | O46.012, O46.013,<br>O46.019 | Antepartum hemorrhage with afibrinogenemia; second, third, unspecified trimester                                   |
|        | O46.022, O46.023,<br>O46.029 | Antepartum hemorrhage with dissem intravascular coagulation; second, third, unspecified trimester                  |
|        | O46.092, O46.093,<br>O46.099 | Antepartum hemorrhage with other coagulation defect; second, third, unspecified trimester                          |
|        | O67.0                        | Intrapartum hemorrhage with coagulation defect                                                                     |
|        | O72.3                        | Postpartum coagulation defects                                                                                     |
| 642.6x | O15.x                        | Eclampsia                                                                                                          |
| 997.1  | I97.12x                      | Postprocedural cardiac arrest                                                                                      |
|        | I97.13x                      | Postprocedural heart failure                                                                                       |
|        | I97.710                      | Intraoperative cardiac arrest during cardiac surgery                                                               |
|        | I97.711                      | Intraoperative cardiac arrest during other surgery                                                                 |
| 046.3  | A81.2                        | Progressive multifocal leukoencephalopathy                                                                         |
| 348.39 | G45.x                        | Transient cerebral ischemic attacks and related syndromes                                                          |
| 362.34 | G46.x                        | Vascular syndromes of brain in cerebrovascular diseases                                                            |
| 430.xx | G93.49                       | Other encephalopathy                                                                                               |
| 431.xx | H34.0x                       | Transient retinal artery occlusion                                                                                 |
| 432.xx | I60.xx                       | Nontraumatic subarachnoid hemorrhage                                                                               |
| 433.xx | I61.xx                       | Nontraumatic intracerebral hemorrhage                                                                              |
| 434.xx | I62.xx                       | Other and unspecified nontraumatic intracranial hemorrhage                                                         |
| 435.xx | I63.xx                       | Cerebral infarction                                                                                                |
| 436.xx | I65.xx                       | Occlusion and stenosis of precerebral arteries, not resulting in cerebral infarction                               |
| 437.xx | I66.xx                       | Occlusion and stenosis of cerebral arteries, not resulting in cerebral infarction                                  |
| 671.5x | I67.xx                       | Other cerebrovascular diseases                                                                                     |
| 674.0x | I68.xx                       | Cerebrovascular disorders in diseases classified elsewhere                                                         |
| 997.02 | O22.50                       | Cerebral venous thrombosis in pregnancy, unspecified trimester                                                     |
|        | O22.52                       | Cerebral venous thrombosis in pregnancy, second trimester                                                          |
|        | O22.53                       | Cerebral venous thrombosis in pregnancy, third trimester                                                           |

Declercq E, Cabral H, Cui X, Liu C, Amutah-Onukagha N, Larson e, et al. Using longitudinally linked data to measure severe maternal morbidity. *Obstet Gynecol* 2022;139.

The authors provided this information as a supplement to their article.

©2022 American College of Obstetricians and Gynecologists.

|        |                              |                                                                                          |
|--------|------------------------------|------------------------------------------------------------------------------------------|
|        | I97.81x                      | Intraoperative cerebrovascular infarction                                                |
|        | I97.82x                      | Postprocedural cerebrovascular infarction                                                |
|        | O87.3                        | Cerebral venous thrombosis in the puerperium                                             |
| 518.4  | J81.0                        | Acute pulmonary edema                                                                    |
| 428.0  | I50.1                        | Left ventricular failure                                                                 |
| 428.1  | I50.20                       | Unspecified systolic (congestive) heart failure                                          |
| 428.20 | I50.21                       | Acute systolic (congestive) heart failure                                                |
| 428.21 | I50.23                       | Acute on chronic systolic (congestive) heart failure                                     |
| 428.23 | I50.30                       | Unspecified diastolic (congestive) heart failure                                         |
| 428.30 | I50.31                       | Acute diastolic (congestive) heart failure                                               |
| 428.31 | I50.33                       | Acute on chronic diastolic (congestive) heart failure                                    |
| 428.33 | I50.40                       | Unspecified combined systolic (congestive) and diastolic (congestive) heart failure      |
| 428.40 | I50.41                       | Acute combined systolic (congestive) and diastolic (congestive) heart failure            |
| 428.41 | I50.43                       | Acute on chronic combined systolic (congestive) and diastolic (congestive) heart failure |
| 428.43 | I50.810                      | Right heart failure, unspecified                                                         |
|        | I50.811                      | Acute right heart failure                                                                |
|        | I50.813                      | Acute on chronic right heart failure                                                     |
|        | I50.814                      | Right heart failure due to left heart failure                                            |
|        | I50.82                       | Biventricular heart failure                                                              |
|        | I50.83                       | High output heart failure                                                                |
|        | I50.84                       | End stage heart failure                                                                  |
|        | I50.89                       | Other heart failure                                                                      |
| 428.9  | I50.9                        | Heart failure, unspecified                                                               |
| 668.0x | O29.112, O29.113,<br>O29.119 | Cardiac arrest due to anesthesia during pregnancy; second, third, unspecified trimester  |
| 668.1x | O29.122, O29.123,<br>O29.129 | Cardiac failure due to anesthesia during pregnancy; second, third, unspecified trimester |
| 668.2x | O29.192, O29.193,<br>O29.199 | Oth cardiac comp of anesth during preg; second, third, unspecified trimester             |
| 995.4  | O29.212, O29.213,<br>O29.219 | Cerebral anoxia due to anesth during preg; second, third, unspecified trimester          |
| 995.86 | O29.292, O29.293,<br>O29.299 | Oth cnsl comp of anesth during pregnancy; second, third, unspecified trimester           |
|        | O74.0                        | Aspiration pneumonitis due to anesthesia during labor and delivery                       |

Declercq E, Cabral H, Cui X, Liu C, Amutah-Onukagha N, Larson e, et al. Using longitudinally linked data to measure severe maternal morbidity. *Obstet Gynecol* 2022;139.

The authors provided this information as a supplement to their article.

©2022 American College of Obstetricians and Gynecologists.

|        |          |                                                                                                                    |
|--------|----------|--------------------------------------------------------------------------------------------------------------------|
|        | O74.1    | Other pulmonary complications of anesthesia during labor and delivery                                              |
|        | O74.2    | Cardiac complications of anesthesia during labor and delivery                                                      |
|        | O74.3    | Central nervous system complications of anesthesia during labor and delivery                                       |
|        | O89.0x   | Pulmonary complications of anesthesia during the puerperium                                                        |
|        | O89.1    | Cardiac complications of anesthesia during the puerperium                                                          |
|        | O89.2    | Central nervous system complications of anesthesia during the puerperium                                           |
|        | T88.2XXA | Shock due to anesthesia, initial encounter                                                                         |
|        | T88.3XXA | Malignant hyperthermia due to anesthesia, initial encounter                                                        |
| 038.xx | O85      | Puerperal sepsis                                                                                                   |
| 670.2x | R65.21   | Severe sepsis with septic shock                                                                                    |
| 998.02 | R65.20   | Severe sepsis without septic shock                                                                                 |
| 995.92 | T81.44XA | Sepsis following a procedure                                                                                       |
| 995.91 | T81.12XA | Postprocedural septic shock                                                                                        |
| 785.52 | I76      | Septic arterial embolism                                                                                           |
| 449    | O86.04   | Sepsis following an obstetrical procedure                                                                          |
|        | A40.x    | Streptococcal sepsis                                                                                               |
|        | A41.x    | Other sepsis                                                                                                       |
|        | A32.7    | Listerial sepsis                                                                                                   |
| 669.1x | O75.1    | Shock during or following labor and delivery                                                                       |
|        | R57.x    | Shock, not elsewhere classified                                                                                    |
| 785.50 |          |                                                                                                                    |
| 785.51 | T78.2XXA | Anaphylactic shock, unspecified, initial encounter                                                                 |
| 785.59 |          |                                                                                                                    |
| 995.0  | T88.6XXA | Anaphylactic reaction due to adverse effect of correct drug or medicament properly administered, initial encounter |
|        | T81.10XA | Postprocedural shock unspecified, initial encounter                                                                |
| 998.0x | T81.11XA | Postprocedural cardiogenic shock, initial encounter                                                                |
| 998.00 | T81.19XA | Other postprocedural shock, initial encounter                                                                      |
| 998.01 |          |                                                                                                                    |
| 998.09 |          |                                                                                                                    |
| 282.42 | D57.0x   | Hb-SS disease with crisis                                                                                          |
| 282.62 | D57.21x  | Sickle cell/Hb-C disease with crisis                                                                               |
| 282.64 | D57.41x  | Sickle cell thalassemia with crisis                                                                                |
| 282.69 | D57.81x  | Other sickle cell disorders with crisis                                                                            |
| 289.52 |          |                                                                                                                    |
| 415.0  | I26.01   | Septic pulmonary embolism with acute cor pulmonale                                                                 |
|        | I26.02   | Saddle embolus of pulmonary artery with acute cor pulmonale                                                        |
|        | I26.09   | Other pulmonary embolism with acute core pulmonale                                                                 |

Declercq E, Cabral H, Cui X, Liu C, Amutah-Onukagha N, Larson e, et al. Using longitudinally linked data to measure severe maternal morbidity. *Obstet Gynecol* 2022;139.

The authors provided this information as a supplement to their article.

©2022 American College of Obstetricians and Gynecologists.

|        |                |                                                                                              |
|--------|----------------|----------------------------------------------------------------------------------------------|
|        | I26.90         | Septic pulmonary embolism without acute cor pulmonale                                        |
|        | I26.92         | Saddle embolus of pulmonary artery without acute cor pulmonale                               |
|        | I26.93         | Single subsegmental pulmonary embolism without acute core pulmonale                          |
|        | I26.94         | Multiple subsegmental pulmonary emboli without acute cor pulmonale                           |
|        | I26.99         | Other pulmonary embolism without acute cor pulmonale                                         |
| 415.1x | O88.012-O88.03 | Obstetric air embolism                                                                       |
| 673.0x | O88.212-O88.23 | Obstetric thromboembolism                                                                    |
| 673.2x | O88.312-O88.33 | Obstetric pyemic and septic embolism                                                         |
| 673.3x | O88.812-O88.83 | Other obstetric embolism                                                                     |
| 673.8x | T80.0XXA       | Air embolism following infusion, transfusion and therapeutic injection, initial encounter    |
| 99.0x  | 30230H0        | Transfusion of autologous whole blood into peripheral vein, open approach                    |
|        | 30230K0        | Transfusion of autologous frozen plasma into peripheral vein, open approach                  |
|        | 30230L0        | Transfusion of autologous fresh plasma into peripheral vein, open approach                   |
|        | 30230M0        | Transfusion of autologous plasma cryoprecipitate into peripheral vein, open approach         |
|        | 30230N0        | Transfusion of autologous red blood cells into peripheral vein, open approach                |
|        | 30230P0        | Transfusion of autologous frozen red cells into peripheral vein, open approach               |
|        | 30230R0        | Transfusion of autologous platelets into peripheral vein, open approach                      |
|        | 30230T0        | Transfusion of autologous fibrinogen into peripheral vein, open approach                     |
|        | 30230H1        | Transfusion of nonautologous whole blood into peripheral vein, open approach                 |
|        | 30230K1        | Transfusion of nonautologous frozen plasma into peripheral vein, open approach               |
|        | 30230L1        | Transfusion of nonautologous fresh plasma into peripheral vein, open approach                |
|        | 30230M1        | Transfusion of nonautologous plasma cryoprecipitate into peripheral vein, open approach      |
|        | 30230N1        | Transfusion of nonautologous red blood cells into peripheral vein, open approach             |
|        | 30230P1        | Transfusion of nonautologous frozen red cells into peripheral vein, open approach            |
|        | 30230R1        | Transfusion of nonautologous platelets into peripheral vein, open approach                   |
|        | 30230T1        | Transfusion of nonautologous fibrinogen into peripheral vein, open approach                  |
|        | 30233H0        | Transfusion of autologous whole blood into peripheral vein, percutaneous approach            |
|        | 30233K0        | Transfusion of autologous frozen plasma into peripheral vein, percutaneous approach          |
|        | 30233L0        | Transfusion of autologous fresh plasma into peripheral vein, percutaneous approach           |
|        | 30233M0        | Transfusion of autologous plasma cryoprecipitate into peripheral vein, percutaneous approach |
|        | 30233N0        | Transfusion of autologous red blood cells into peripheral vein, percutaneous approach        |
|        | 30233P0        | Transfusion of autologous frozen red cells into peripheral vein, percutaneous approach       |
|        | 30233R0        | Transfusion of autologous platelets into peripheral vein, percutaneous approach              |
|        | 30233T0        | Transfusion of autologous fibrinogen into peripheral vein, percutaneous approach             |
|        | 30233H1        | Transfusion of nonautologous whole blood into peripheral vein, percutaneous approach         |
|        | 30233K1        | Transfusion of nonautologous frozen plasma into peripheral vein, percutaneous approach       |
|        | 30233L1        | Transfusion of nonautologous fresh plasma into peripheral vein, percutaneous approach        |

Declercq E, Cabral H, Cui X, Liu C, Amutah-Onukagha N, Larson e, et al. Using longitudinally linked data to measure severe maternal morbidity. *Obstet Gynecol* 2022;139.

The authors provided this information as a supplement to their article.

©2022 American College of Obstetricians and Gynecologists.

|       |         |                                                                                                 |
|-------|---------|-------------------------------------------------------------------------------------------------|
|       | 30233M1 | Transfusion of nonautologous plasma cryoprecipitate into peripheral vein, percutaneous approach |
|       | 30233N1 | Transfusion of nonautologous red blood cells into peripheral vein, percutaneous approach        |
|       | 30233P1 | Transfusion of nonautologous frozen red cells into peripheral vein, percutaneous approach       |
|       | 30233R1 | Transfusion of nonautologous platelets into peripheral vein, percutaneous approach              |
|       | 30233T1 | Transfusion of nonautologous fibrinogen into peripheral vein, percutaneous approach             |
|       | 30240H0 | Transfusion of autologous whole blood into central vein, open approach                          |
|       | 30240K0 | Transfusion of autologous frozen plasma into central vein, open approach                        |
|       | 30240L0 | Transfusion of autologous fresh plasma into central vein, open approach                         |
|       | 30240M0 | Transfusion of autologous plasma cryoprecipitate into central vein, open approach               |
|       | 30240N0 | Transfusion of autologous red blood cells into central vein, open approach                      |
|       | 30240P0 | Transfusion of autologous frozen red cells into central vein, open approach                     |
|       | 30240R0 | Transfusion of autologous platelets into central vein, open approach                            |
|       | 30240T0 | Transfusion of autologous fibrinogen into central vein, open approach                           |
|       | 30240H1 | Transfusion of nonautologous whole blood into central vein, open approach                       |
|       | 30240K1 | Transfusion of nonautologous frozen plasma into central vein, open approach                     |
|       | 30240L1 | Transfusion of nonautologous fresh plasma into central vein, open approach                      |
|       | 30240M1 | Transfusion of nonautologous plasma cryoprecipitate into central vein, open approach            |
|       | 30240N1 | Transfusion of nonautologous red blood cells into central vein, open approach                   |
|       | 30240P1 | Transfusion of nonautologous frozen red cells into central vein, open approach                  |
|       | 30240R1 | Transfusion of nonautologous platelets into central vein, open approach                         |
|       | 30240T1 | Transfusion of nonautologous fibrinogen into central vein, open approach                        |
|       | 30243H0 | Transfusion of autologous whole blood into central vein, percutaneous approach                  |
|       | 30243K0 | Transfusion of autologous frozen plasma into central vein, percutaneous approach                |
|       | 30243L0 | Transfusion of autologous fresh plasma into central vein, percutaneous approach                 |
|       | 30243M0 | Transfusion of autologous plasma cryoprecipitate into central vein, percutaneous approach       |
|       | 30243N0 | Transfusion of autologous red blood cells into central vein, percutaneous approach              |
|       | 30243P0 | Transfusion of autologous frozen red cells into central vein, percutaneous approach             |
|       | 30243R0 | Transfusion of autologous platelets into central vein, percutaneous approach                    |
|       | 30243T0 | Transfusion of autologous fibrinogen into central vein, percutaneous approach                   |
|       | 30243H1 | Transfusion of nonautologous whole blood into central vein, percutaneous approach               |
|       | 30243K1 | Transfusion of nonautologous frozen plasma into central vein, percutaneous approach             |
|       | 30243L1 | Transfusion of nonautologous fresh plasma into central vein, percutaneous approach              |
|       | 30243M1 | Transfusion of nonautologous plasma cryoprecipitate into central vein, percutaneous approach    |
|       | 30243N1 | Transfusion of nonautologous red blood cells into central vein, percutaneous approach           |
|       | 30243P1 | Transfusion of nonautologous frozen red cells into central vein, percutaneous approach          |
|       | 30243R1 | Transfusion of nonautologous platelets into central vein, percutaneous approach                 |
|       | 30243T1 | Transfusion of nonautologous fibrinogen into central vein, percutaneous approach                |
| 68.39 | OUT9OZZ | Resection of uterus, open approach                                                              |

Declercq E, Cabral H, Cui X, Liu C, Amutah-Onukagha N, Larson e, et al. Using longitudinally linked data to measure severe maternal morbidity. *Obstet Gynecol* 2022;139.

The authors provided this information as a supplement to their article.

©2022 American College of Obstetricians and Gynecologists.

|       |         |                                                                                        |
|-------|---------|----------------------------------------------------------------------------------------|
| 68.49 | OUT97ZL | Resection of Uterus, Supracervical, Via Natural or Artificial Opening                  |
| 68.59 | OUT97ZZ | Resection of uterus, via natural or artificial opening                                 |
| 68.69 | OUT90ZL | Resection of uterus, supracervical, open approach                                      |
| 68.79 |         |                                                                                        |
| 68.9x |         |                                                                                        |
| 31.1  | OB110F4 | Bypass trachea to cutaneous with tracheostomy device, open approach                    |
|       | OB113F4 | Bypass trachea to cutaneous with tracheostomy device, percutaneous approach            |
|       | OB114F4 | Bypass trachea to cutaneous with tracheostomy device, percutaneous endoscopic approach |
| 96.70 | 5A1935Z | Respiratory ventilation, less than 24 consecutive hours                                |
| 96.71 | 5A1945Z | Respiratory ventilation, 24-96 consecutive hours                                       |
| 96.72 | 5A1955Z | Respiratory ventilation, greater than 96 consecutive hours                             |

Declercq E, Cabral H, Cui X, Liu C, Amutah-Onukagha N, Larson e, et al. Using longitudinally linked data to measure severe maternal morbidity. *Obstet Gynecol* 2022;139.

The authors provided this information as a supplement to their article.

©2022 American College of Obstetricians and Gynecologists.



**Appendix. 3 Comparison of Characteristics of Analytic Sample to U.S. Birthing Population, 2009-2018.**

|                                             | U.S.<br>(n=39,528,323) | Analytic Sample<br>(n=594,056) |
|---------------------------------------------|------------------------|--------------------------------|
| <b>Maternal Age</b>                         | %                      | %                              |
| < 20                                        | 7.0                    | 4.2                            |
| 20-24                                       | 22.1                   | 14.2                           |
| 25-29                                       | 28.7                   | 24.7                           |
| 30-34                                       | 26.4                   | 33.8                           |
| 35-39                                       | 12.8                   | 18.6                           |
| 40+                                         | 3.0                    | 4.4                            |
| <b>Race Ethnicity</b>                       |                        |                                |
| Non-Hispanic White                          | 54.0                   | 62.1                           |
| Non-Hispanic Black                          | 15.0                   | 10.1                           |
| Non-Hispanic Asian/Pac.Isl.                 | 6.5                    | 8.9                            |
| Non-Hispanic American Indian Alaskan Native | 1.0                    | 0.9                            |
| Hispanic                                    | 23.5                   | 18.1                           |
| <b>Parity</b>                               |                        |                                |
| 1                                           | 39.2                   | 45.3                           |
| 2                                           | 31.8                   | 34.3                           |
| 3                                           | 16.8                   | 13.6                           |
| 4+                                          | 12.2                   | 6.9                            |
| <b>Maternal Education</b>                   |                        |                                |
| < High School                               | 15.9                   | 10.2                           |
| High School or GED                          | 25.4                   | 22.9                           |
| Some College                                | 28.8                   | 21.2                           |
| College and Above                           | 29.9                   | 45.7                           |

Data from U.S. Data -- United States Department of Health and Human Services (US DHHS), Centers for Disease Control and Prevention (CDC), National Center for Health Statistics (NCHS), Division of Vital Statistics, Natality public-use data 2007-2019, on CDC WONDER Online Database, October 2020. Accessed 9/26/21.

Declercq E, Cabral H, Cui X, Liu C, Amutah-Onukagha N, Larson e, et al. Using longitudinally linked data to measure severe maternal morbidity. *Obstet Gynecol* 2022;139.

The authors provided this information as a supplement to their article.

©2022 American College of Obstetricians and Gynecologists.
